# Supplementary material
Source: PubMed Central journal article supplement (PMC4107002)
Supplement: NIHMS581481-supplement-Supp_FigureS1-S5.pdf [file NIHMS581481-supplement-Supp_FigureS1-S5.pdf]

Electrode track

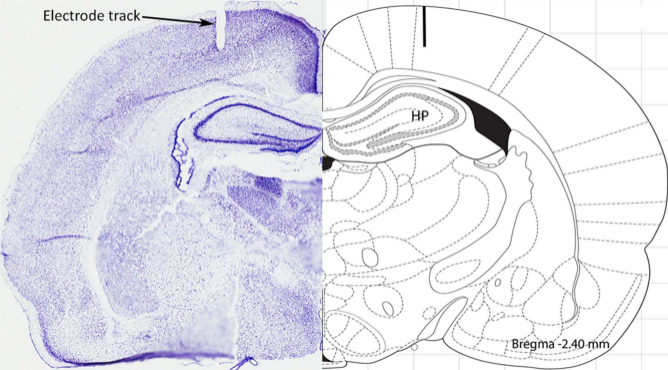

**Left Cx**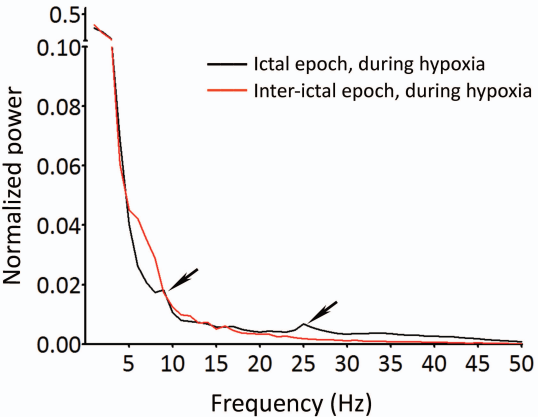**Right Cx**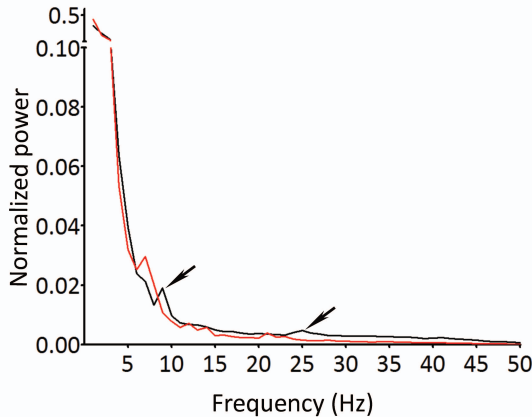

**A**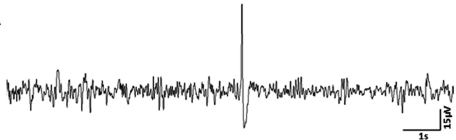**B**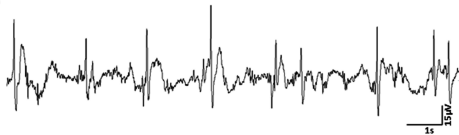**C**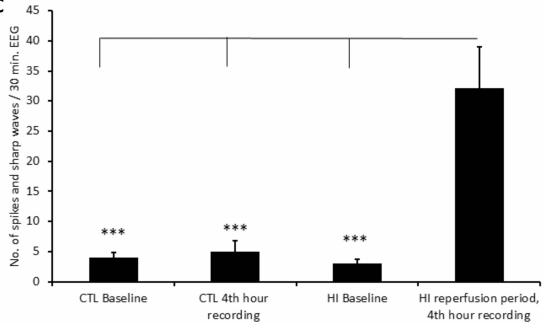

Lt Cx

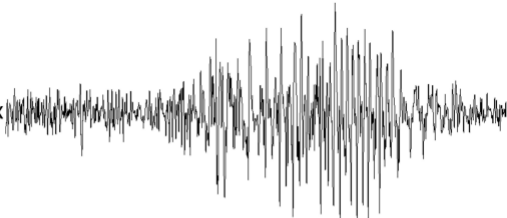

Rt Cx

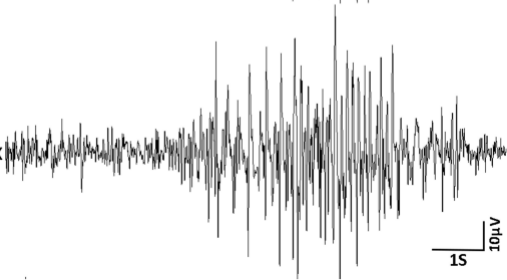

10  $\mu$ V  
1S

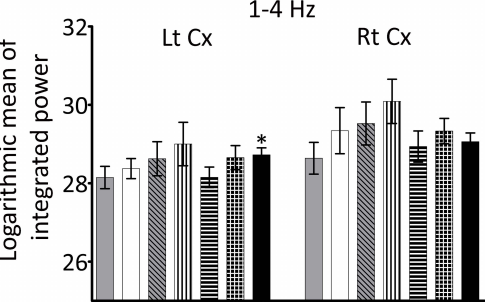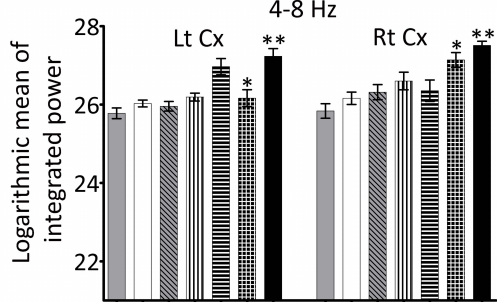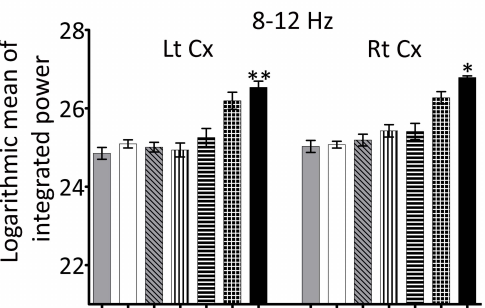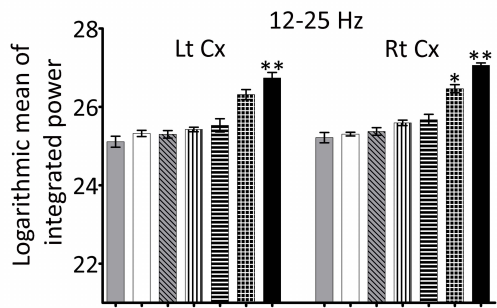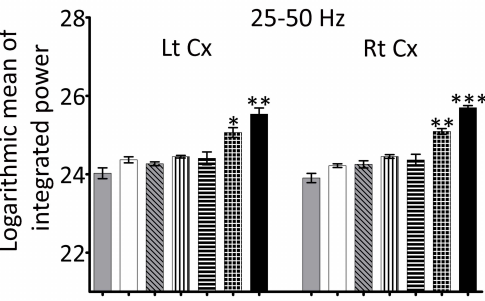

- Time matched CTL, baseline, P7
- Time matched CTL, before hypoxia, P7
- Time matched CTL, during hypoxia, P7
- Time matched CTL, after HI, P7
- Time matched CTL, P8
- Time matched CTL, P9
- Time matched CTL, P10
